# Supplementary material
Source: publisher figshare collection journal article supplement (https://sage.figshare.com/ndownloader/files/20186283)

Appendix C: Flow Diagram

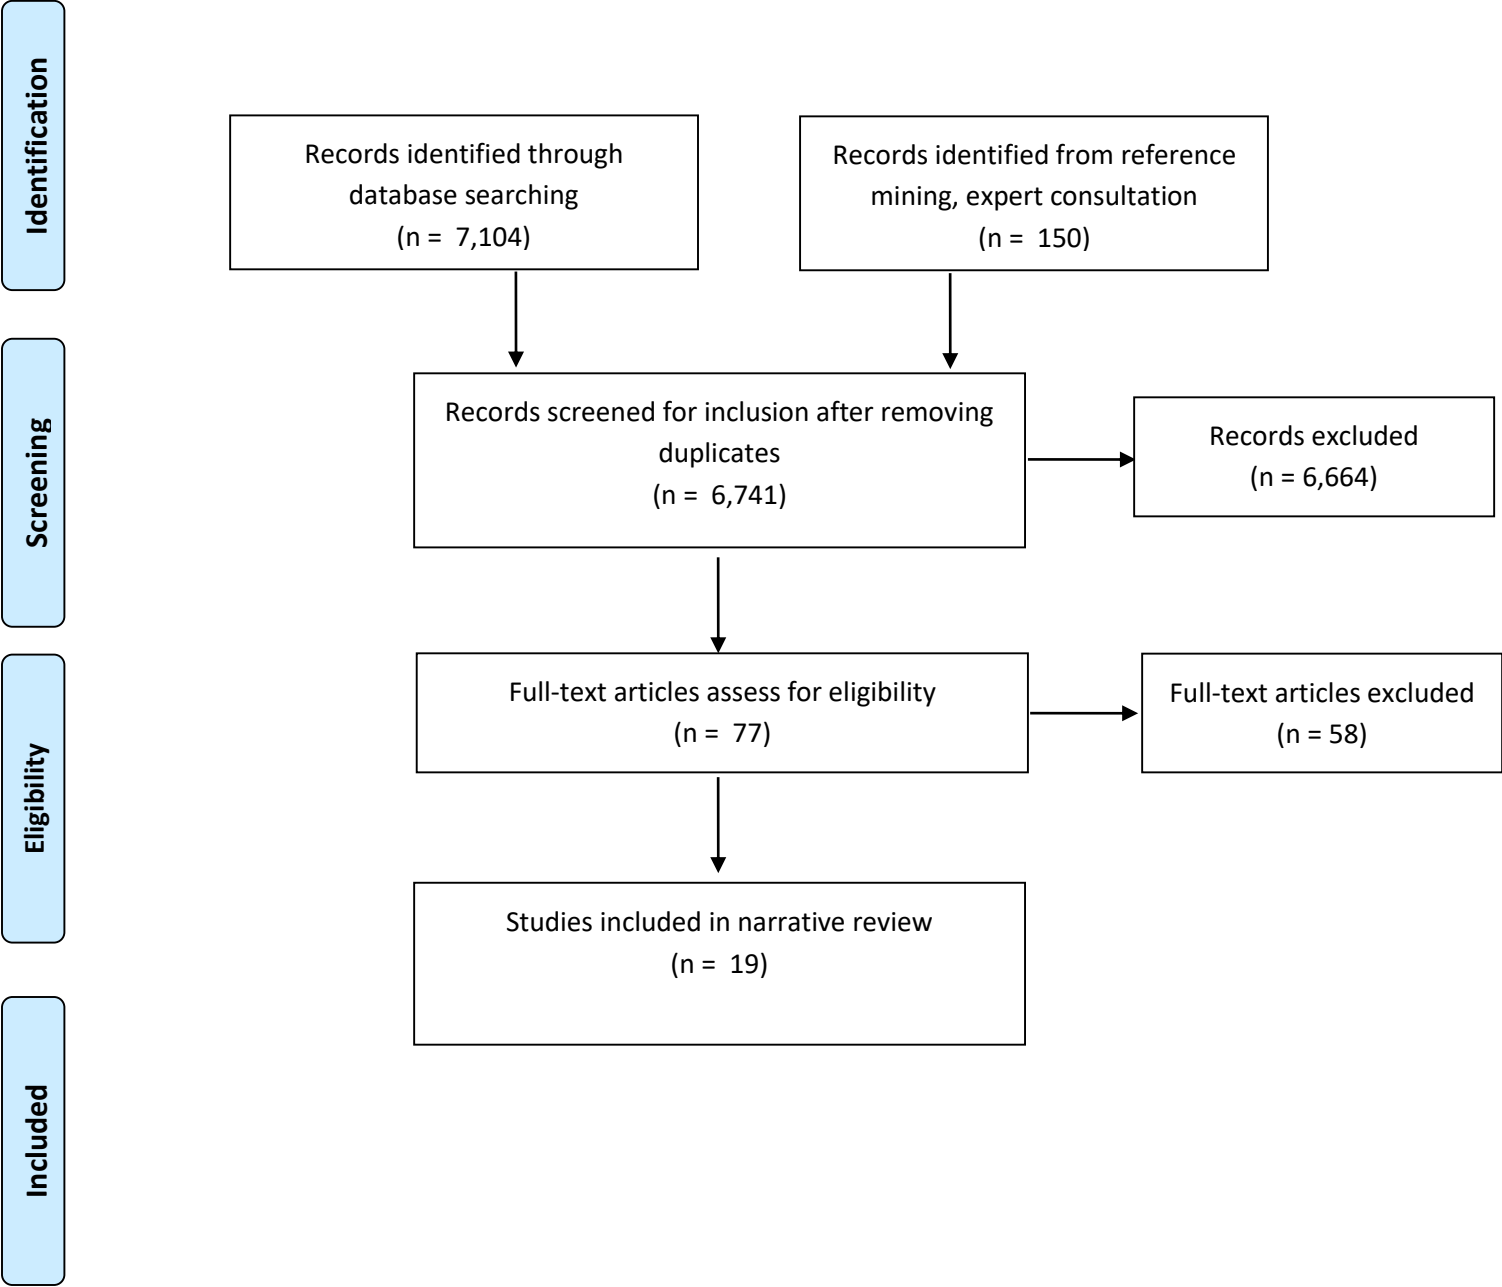

Supplement: Supplementary file 1 [file 20186283]
